# Supplementary material
Source: PubMed Central journal article supplement (PMC2547985)
Supplement: NIHMS65093-supplement-2.pdf [file NIHMS65093-supplement-2.pdf]

**Title:** Peptide Amphiphile Nanofibers with Conjugated Polydiacetylene  
Backbones in their Core

**Authors:** Lorraine Hsu, Gregory L. Cvetanovich, and Samuel I. Stupp

**Supplementary Information**

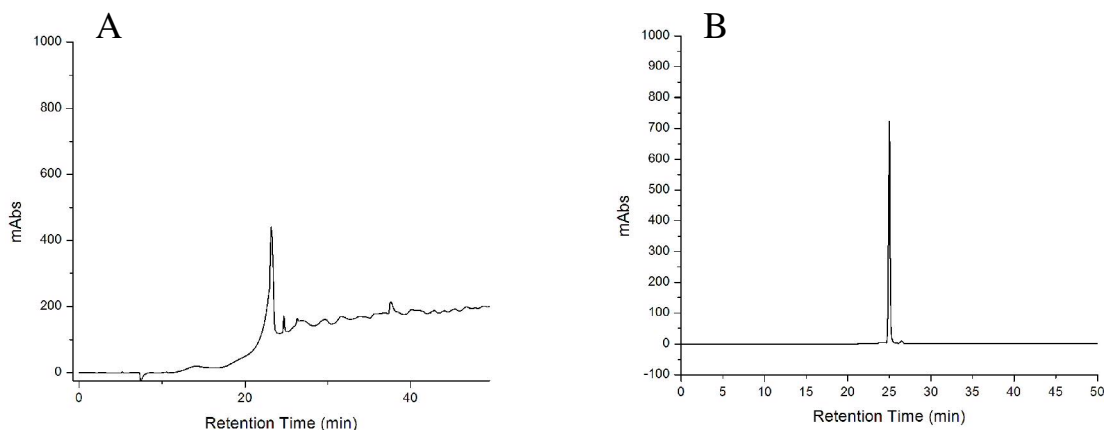

**Figure 1:** HPLC traces of: Linear PA (A) and Branched PA (B).

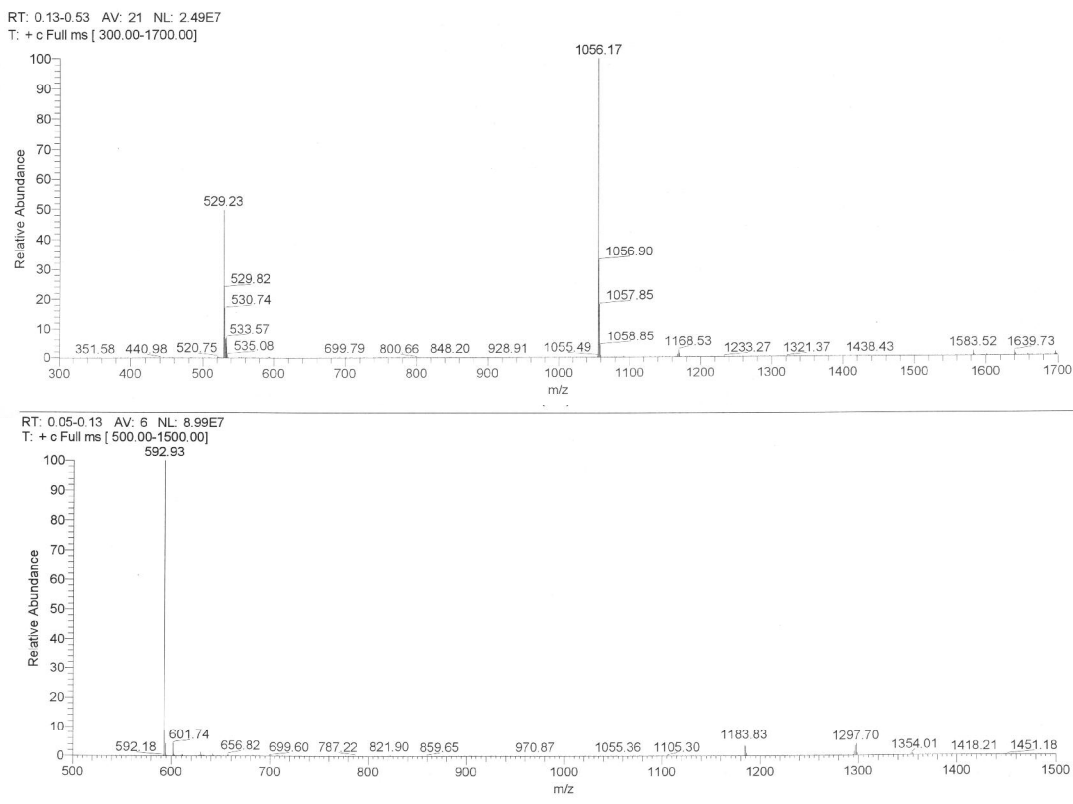

**Figure 2:** ESI spectra of Linear PA (Top)-  $m/z$  (expected): 1055 g/mol;  $m/z$  (observed): 1056.17,  $m/2z$  (observed): 529.23.

ESI spectra of Branched PA (Bottom)-  $m/z$  (expected): 1184 g/mol;  $m/z$  (observed): 1183.83,  $m/2z$  (observed): 592.93

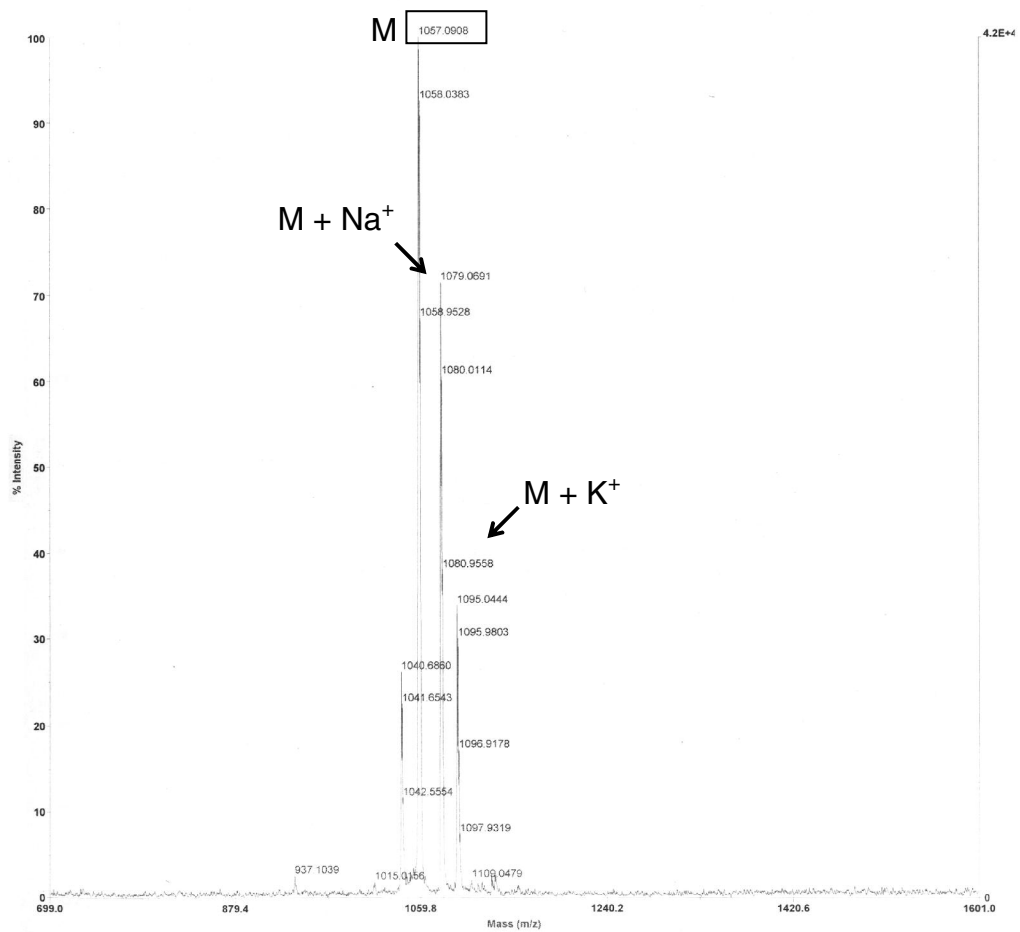

**Figure 3:** MALDI spectra of Linear PA (Top)-  $m/z$  (*expected*): 1055 g/mol;  $m/z$  (*observed*): 1057.

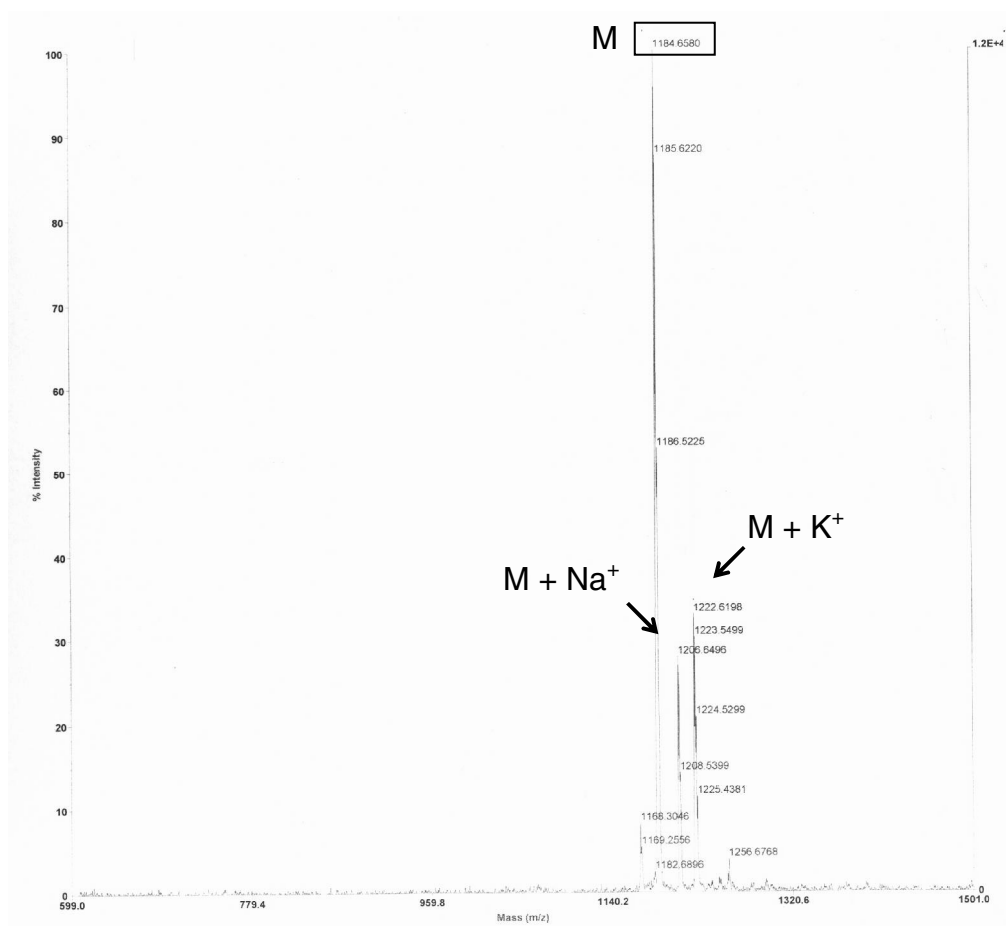

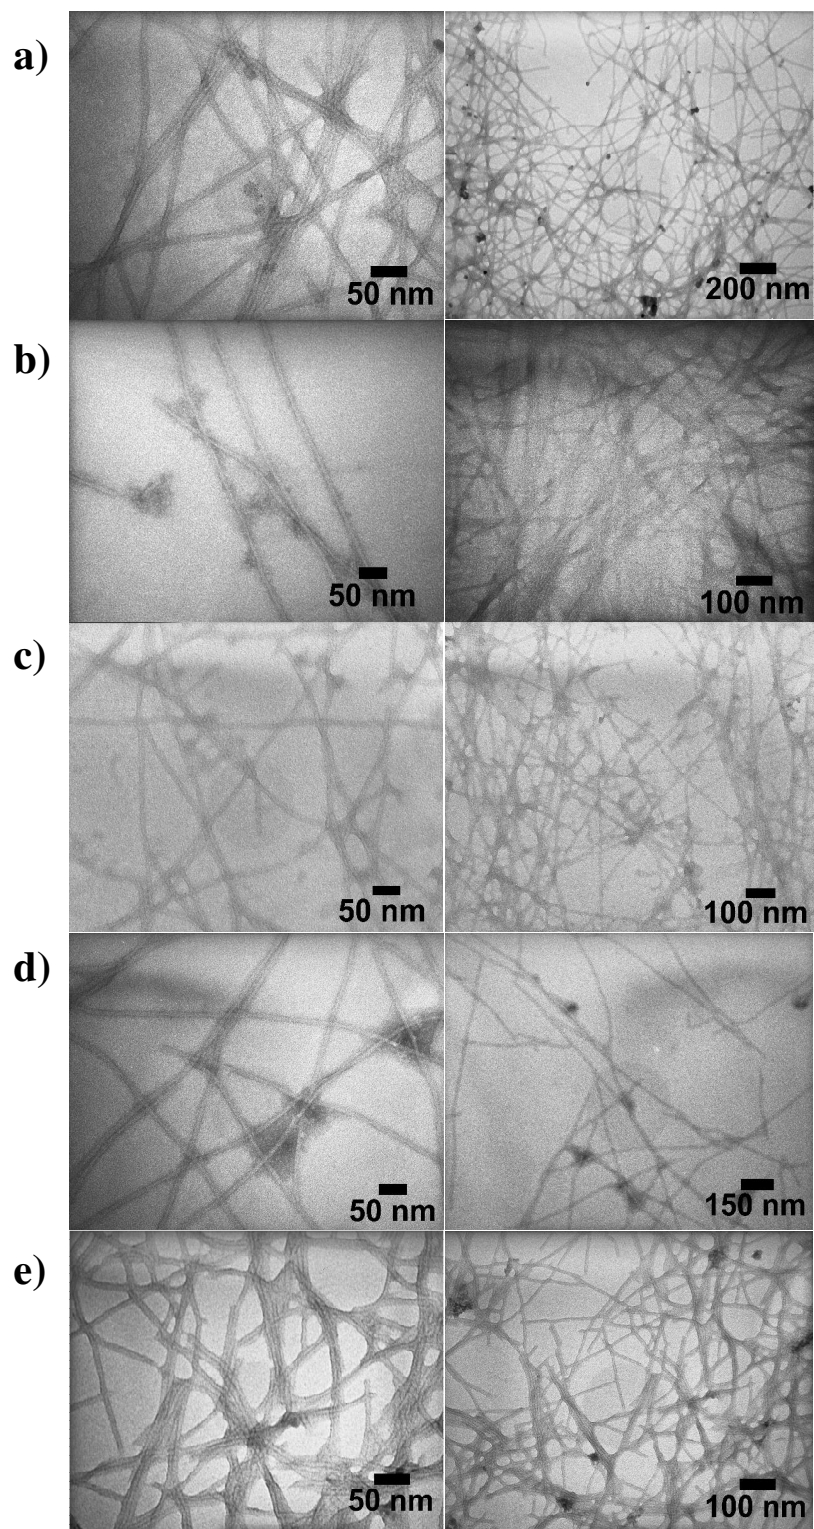

**Figure 5:** TEM of Linear PA at varying pHs. (a) pH 2 (b) pH 4 (c) pH 7 (d) pH 10 (e) pH 12. Samples were solubilized at the selected pH (1 wt%), irradiated for 2 minutes, and then prepared for TEM imaging.
